# Supplementary material for: Genetic Reconstruction of Protozoan rRNA Decoding Sites Provides a Rationale for Paromomycin Activity against Leishmania and Trypanosoma
Source: PLOS journal article supplement (doi:10.1371/journal.pntd.0001161), 2011-05-24

Figure S2. Chemical structures of 2-deoxystreptamines used in this study.

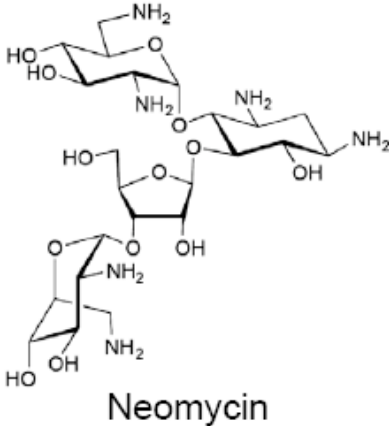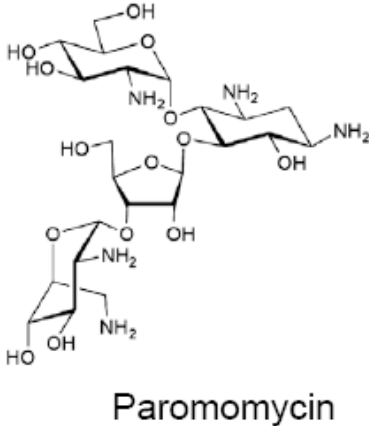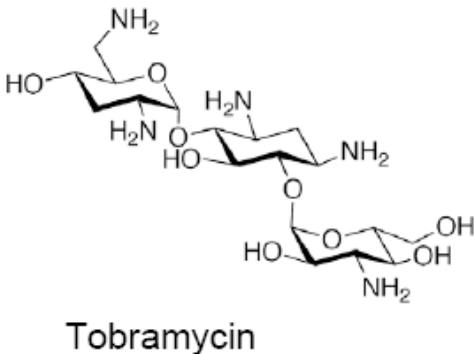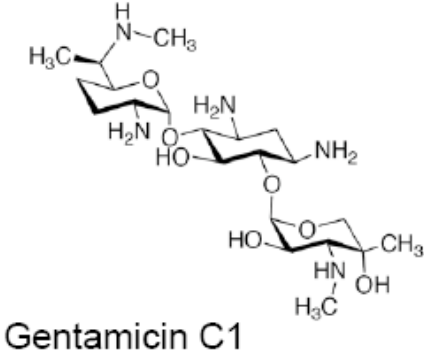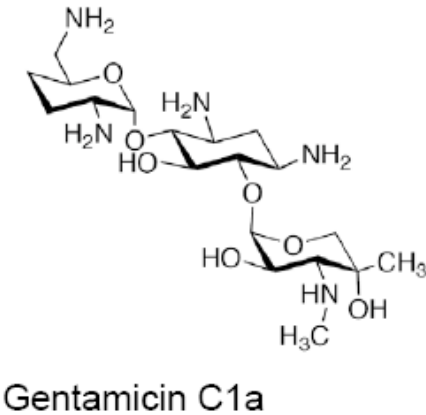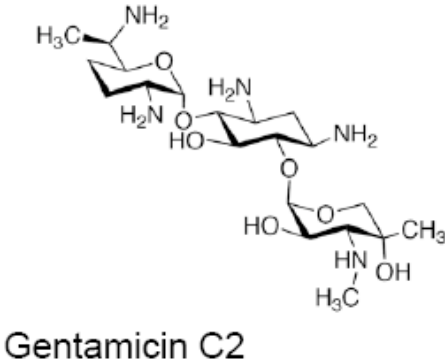

Supplement: S2 (10.1371/journal.pntd.0001161.s002) [file journal.pntd.0001161.s002]
